# Supplementary material
Source: publisher figshare collection journal article supplement (https://future-science-group.figshare.com/ndownloader/files/28985229)
Supplement: Supplementary file 1 [file 28985229]

**Supplemental Table 1:** The detailed assessment process of case-control or cohort studies included into analysis A

|  | Selection 1) | Selection 2) | Selection 3) | Selection 4) | Comparability 1) | Exposure 1) | Exposure 2) | Exposure 3) | Score |
| --- | --- | --- | --- | --- | --- | --- | --- | --- | --- |
| **Case Control Studies** | | | | | | | | | |
| Goldstein | 1 | 1 | 1 | 1 | 2 | 1 | 1 | 1 | 9 |
| Cohen 2017 | 1 | 1 | 1 | 1 | 0 | 1 | 1 | 1 | 7 |
| Malesci | 1 | 1 | 1 | 1 | 0 | 1 | 1 | 1 | 7 |
| Kalady | 1 | 1 | 1 | 1 | 1 | 1 | 1 | 1 | 7 |
| **Cohort Studies** | | | | | | | | | |
| Venderbosch | 1 | 1 | 1 | 1 | 1 | 1 | 1 | 1 | 8 |
| Cohen 2020 | 1 | 1 | 1 | 1 | 0 | 1 | 1 | 1 | 7 |
| Phipps | 1 | 1 | 1 | 1 | 1 | 1 | 1 | 1 | 8 |
| Wangefjord | 1 | 1 | 1 | 1 | 1 | 1 | 1 | 1 | 8 |
| Lockhead | 1 | 1 | 1 | 1 | 1 | 1 | 1 | 1 | 8 |
